# Supplementary material for: Combining the chemistries of silylene and sulfur-nitrogen compounds—SiS2N2 and related systems
Source: Royal Society of Chemistry journal article supplement (doi:10.1039/b923084j), 2010-01-01
Supplement: b923084j.pdf [file b923084j.pdf]

## SUPPORTING INFORMATION

# COMBINING THE CHEMISTRIES OF SILYLENE AND SULFUR-NITROGEN COMPOUNDS – SiS<sub>2</sub>N<sub>2</sub> AND RELATED SYSTEMS

Julianna Oláh,<sup>a</sup> Tamás Veszprémi,<sup>b</sup> J. Derek Woollins,<sup>c</sup> Frank Blockhuys<sup>d\*</sup>

<sup>a</sup>*Department of Inorganic and Analytical Chemistry and Materials Structure and Modeling*

*Research Group of the Hungarian Academy of Sciences,*

*Budapest University of Technology and Economics,*

*P.O. Box 91, 1521 Budapest, Hungary*

<sup>b</sup>*Department of Inorganic and Analytical Chemistry,*

*Budapest University of Technology and Economics,*

*Gellért tér 4, H-1521 Budapest, Hungary*

<sup>c</sup>*School of Chemistry, University of St Andrews,*

*North Haugh, St Andrews, Fife, KY16 9ST, United Kingdom*

<sup>d</sup>*Department of Chemistry, University of Antwerp,*

*Universiteitsplein 1, B-2610 Wilrijk, Belgium*

---

\*Corresponding author. Fax +32.3.820.23.10, e-mail [frank.blockhuys@ua.ac.be](mailto:frank.blockhuys@ua.ac.be).

**Table S1.** Calculated singlet-triplet energy gaps at CCSD(T) level with cc-pVDZ, cc-pVTZ, and cc-pVQZ basis sets and extrapolated to the infinite basis set limit using HF and KS-B3LYP reference wavefunctions. Numbers shown in red are presented in Table 1 of the manuscript. All values are given in kJ/mol. In Italics those results are presented where the CCSD(T) calculation resulted in singles or doubles excitations larger than 0.1.

| silylene               | wavefunction | cc-pVDZ      | cc-pVTZ      | cc-pVQZ      | cc- $V_{\infty}Z$ |
|------------------------|--------------|--------------|--------------|--------------|-------------------|
| <b>SiH<sub>2</sub></b> | HF           | <i>79.5</i>  | <i>85.8</i>  | <i>86.2</i>  | <i>87.5</i>       |
|                        | KS           | 84.6         | 93.4         | 96.3         | 97.6              |
| <b>9a</b>              | HF           | <i>213.9</i> | <i>224.4</i> | <i>229.4</i> | <i>229.4</i>      |
|                        | KS           | <i>206.0</i> | <i>215.2</i> | <i>219.8</i> | <i>220.2</i>      |
| <b>9b</b>              | HF           | <i>116.0</i> | <i>128.5</i> | <i>134.4</i> | 135.2             |
|                        | KS           | <i>113.5</i> | <i>126.0</i> | <i>131.9</i> | <i>133.6</i>      |
| <b>10</b>              | HF           | <i>258.3</i> | <i>276.7</i> | <i>280.9</i> | <i>283.0</i>      |
|                        | KS           | 257.9        | 276.7        | 280.5        | 282.2             |
| <b>11</b>              | HF           | <i>313.2</i> | <i>315.3</i> | <i>315.7</i> | <i>316.9</i>      |
|                        | KS           | 313.6        | 315.3        | 315.3        | 316.5             |
| <b>12</b>              | HF           | <i>249.1</i> | <i>264.6</i> | <i>269.6</i> | <i>272.1</i>      |
|                        | KS           | 248.7        | 263.3        | 268.4        | 270.9             |
| <b>13</b>              | HF           | <i>279.3</i> | <i>278.0</i> | <i>277.6</i> | <i>278.8</i>      |
|                        | KS           | 279.3        | 277.6        | 276.7        | 277.6             |
| <b>14</b>              | HF           | *            | <i>252.9</i> | *            |                   |
|                        | KS           | <i>238.2</i> | <i>244.9</i> | <i>248.7</i> | <i>250.8</i>      |
| <b>15</b>              | HF           | <i>237.8</i> | <i>238.2</i> | *            |                   |
|                        | KS           | <i>237.4</i> | <i>237.8</i> | <i>238.2</i> | <i>239.1</i>      |

\* the calculation could not be converged

**Cartesian coordinates and optimized structures of the molecules investigated in the**

paper

**NH<sub>3</sub>**

|                  |                      |                    |           |
|------------------|----------------------|--------------------|-----------|
| <b>level:</b>    | <b>B3LYP/cc-pVTZ</b> |                    |           |
| <b>Geometry:</b> |                      |                    |           |
| N                | 0                    | 0.115411           | 0         |
| H                | -0.937922            | -0.269068          | 0         |
| H                | 0.468961             | -0.269405          | 0.812227  |
| H                | 0.468961             | -0.269405          | -0.812223 |
| <b>Total</b>     | <b>energy</b>        | <b>-56.5847254</b> |           |

**BH<sub>3</sub>**

|                  |                      |                     |   |
|------------------|----------------------|---------------------|---|
| <b>level:</b>    | <b>B3LYP/cc-pVTZ</b> |                     |   |
| <b>Geometry:</b> |                      |                     |   |
| B                | 0                    | 0                   | 0 |
| H                | 0                    | 1.188096            | 0 |
| H                | 1.028921             | -0.594048           | 0 |
| H                | -1.028921            | -0.594048           | 0 |
| <b>Total</b>     | <b>energy</b>        | <b>-26.62421755</b> |   |

**SiH<sub>4</sub>**

|                  |                      |                     |          |
|------------------|----------------------|---------------------|----------|
| <b>level:</b>    | <b>B3LYP/cc-pVTZ</b> |                     |          |
| <b>Geometry:</b> |                      |                     |          |
| Si               | 0                    | 0                   | 0.000035 |
| H                | 0                    | 0                   | 1.482256 |
| H                | 0                    | 1.39772             | -0.49425 |
| H                | 1.210461             | -0.69886            | -0.49425 |
| H                | -1.210461            | -0.69886            | -0.49425 |
| <b>Total</b>     | <b>energy</b>        | <b>-291.9183344</b> |          |

**SiH<sub>2</sub>**

|                  |                      |                     |                 |
|------------------|----------------------|---------------------|-----------------|
|                  |                      | <b>singlet</b>      | <b>silylene</b> |
| <b>level:</b>    | <b>B3LYP/cc-pVTZ</b> |                     |                 |
| <b>Geometry:</b> |                      |                     |                 |
| Si               | 0                    | 0                   | 0.133139        |
| H                | 0                    | 1.093152            | -0.93197        |
| H                | 0                    | -1.093152           | -0.93197        |
| <b>Total</b>     | <b>energy</b>        | <b>-290.6443319</b> |                 |

**Si H<sub>2</sub>**

|                  |                      |                     |                 |
|------------------|----------------------|---------------------|-----------------|
|                  |                      | <b>triplet</b>      | <b>silylene</b> |
| <b>level:</b>    | <b>B3LYP/cc-pVTZ</b> |                     |                 |
| <b>Geometry:</b> |                      |                     |                 |
| Si               | 0                    | 0                   | 0.094879        |
| H                | 0                    | 1.279129            | -0.66416        |
| H                | 0                    | -1.279129           | -0.66416        |
| <b>Total</b>     | <b>energy</b>        | <b>-290.6115901</b> |                 |

**SiH<sub>2</sub>**

|                  |                      |                       |                |
|------------------|----------------------|-----------------------|----------------|
|                  | <b>+</b>             | <b>NH<sub>3</sub></b> | <b>complex</b> |
| <b>level:</b>    | <b>B3LYP/cc-pVTZ</b> |                       |                |
| <b>Geometry:</b> |                      |                       |                |
| Si               | 0.837207             | 0.000037              | -0.13341       |

|                        |                      |                       |                   |
|------------------------|----------------------|-----------------------|-------------------|
| H                      | 0.849009             | -1.111536             | 0.915696          |
| H                      | 0.85236              | 1.109879              | 0.917335          |
| N                      | -1.234302            | 0.000259              | -0.00046          |
| H                      | -1.61462             | -0.816248             | -0.46655          |
| H                      | -1.551369            | -0.00523              | 0.962564          |
| H                      | -1.61616             | 0.820804              | -0.45811          |
| <b>Total</b>           | <b>energy</b>        | <b>-347.2740119</b>   |                   |
| <hr/>                  |                      |                       |                   |
| <b>SiH<sub>2</sub></b> | <b>disilene</b>      | <b>dimer</b>          | <b>derivative</b> |
| <b>level:</b>          | <b>B3LYP/cc-pVTZ</b> |                       |                   |
| <b>Geometry:</b>       |                      |                       |                   |
| Si                     | -1.080999            | -0.000083             | 0.06801           |
| Si                     | 1.081032             | -0.000083             | -0.06807          |
| H                      | -1.829344            | -1.229487             | -0.28134          |
| H                      | -1.827111            | 1.230657              | -0.28153          |
| H                      | 1.826903             | 1.230645              | 0.281937          |
| H                      | 1.829096             | -1.229503             | 0.281741          |
| <b>Total</b>           | <b>energy</b>        | <b>-581.3854988</b>   |                   |
| <hr/>                  |                      |                       |                   |
| <b>9a</b>              | <b>singlet</b>       | <b>silylene</b>       |                   |
| <b>level:</b>          | <b>B3LYP/cc-pVTZ</b> |                       |                   |
| <b>Geometry:</b>       |                      |                       |                   |
| N                      | 0.447221             | -1.352576             | -8.3E-05          |
| S                      | 1.487657             | -0.178155             | -3.2E-05          |
| N                      | 0.752632             | 1.232883              | 0.000206          |
| S                      | -0.907759            | 1.168722              | -8.4E-05          |
| Si                     | -1.262667            | -1.07223              | 0.000072          |
| <b>Total</b>           | <b>energy</b>        | <b>-1195.49288</b>    |                   |
| <hr/>                  |                      |                       |                   |
| <b>9a</b>              | <b>+</b>             | <b>BH<sub>3</sub></b> | <b>complex</b>    |
| <b>level:</b>          | <b>B3LYP/cc-pVTZ</b> |                       |                   |
| <b>Geometry:</b>       |                      |                       |                   |
| N                      | -0.096722            | -1.376053             | -3.1E-05          |
| Si                     | 1.150665             | -0.201307             | -9.1E-05          |
| B                      | 3.129358             | -0.246675             | 0.000085          |
| S                      | -1.589962            | -0.901665             | 0.000023          |
| N                      | -1.695537            | 0.683902              | 0.000052          |
| S                      | -0.248172            | 1.508613              | -9E-06            |
| H                      | 3.369115             | -0.861833             | -1.00889          |
| H                      | 3.461933             | 0.907103              | -0.00105          |
| H                      | 3.368813             | -0.859716             | 1.010434          |
| <b>Total</b>           | <b>energy</b>        | <b>-1222.150214</b>   |                   |
| <hr/>                  |                      |                       |                   |
| <b>9a</b>              | <b>silane</b>        | <b>derivative</b>     |                   |
| <b>level:</b>          | <b>B3LYP/cc-pVTZ</b> |                       |                   |
| <b>Geometry:</b>       |                      |                       |                   |
| N                      | -0.399227            | -1.409893             | -0.00008          |
| Si                     | 1.245705             | -0.849243             | 0.000018          |
| S                      | 0.747156             | 1.327106              | -1.2E-05          |
| N                      | -0.938056            | 1.1537                | -2E-06            |

|                  |                                         |                       |                   |
|------------------|-----------------------------------------|-----------------------|-------------------|
| S                | -1.504026                               | -0.3161               | 0.000021          |
| H                | 2.015604                                | -1.246673             | -1.20339          |
| H                | 2.015421                                | -1.246675             | 1.203551          |
| <b>Total</b>     | <b>energy</b>                           | <b>-1196.701926</b>   |                   |
| <b>9a</b>        | <b>+</b>                                | <b>NH<sub>3</sub></b> | <b>complex</b>    |
| <b>level:</b>    | <b>B3LYP/cc-pVTZ</b>                    |                       |                   |
| <b>Geometry:</b> |                                         |                       |                   |
| N                | -2.241708                               | -0.36124              | 0.998547          |
| Si               | -1.105872                               | 0.052217              | -0.95304          |
| S                | 0.358786                                | 1.549949              | 0.003843          |
| N                | 1.55756                                 | 0.499913              | 0.559148          |
| S                | 1.348234                                | -1.020059             | 0.174004          |
| N                | 0.024738                                | -1.267096             | -0.61614          |
| H                | -2.091444                               | -1.334369             | 1.247261          |
| H                | -1.883597                               | 0.223385              | 1.74817           |
| H                | -3.239184                               | -0.19932              | 0.910672          |
| <b>Total</b>     | <b>energy</b>                           | <b>-1252.08806</b>    |                   |
| <b>9a</b>        | <b>triplet</b>                          | <b>silylene</b>       |                   |
| <b>level:</b>    | <b>B3LYP/cc-pVTZ</b>                    |                       |                   |
| <b>Geometry:</b> |                                         |                       |                   |
| N                | -0.826282                               | 1.191358              | -0.12461          |
| S                | -1.538653                               | -0.22264              | -0.02908          |
| N                | -0.252186                               | -1.434883             | 0.244577          |
| S                | 1.257876                                | -0.888342             | -0.10728          |
| Si               | 0.860122                                | 1.391457              | 0.095857          |
| <b>Total</b>     | <b>energy</b>                           | <b>-1195.421049</b>   |                   |
| <b>9a</b>        | <b>(<math>\mu</math>-N)<sub>2</sub></b> | <b>dimer</b>          | <b>derivative</b> |
| <b>level:</b>    | <b>B3LYP/cc-pVTZ</b>                    |                       |                   |
| <b>Geometry:</b> |                                         |                       |                   |
| Si               | -0.681595                               | -1.08292              | -0.71386          |
| S                | -2.875884                               | -1.207762             | 0.214145          |
| N                | -3.276566                               | 0.399858              | 0.325453          |
| S                | -2.232662                               | 1.464928              | -0.19452          |
| N                | -0.858857                               | 0.732759              | -0.59182          |
| Si               | 0.681603                                | 1.082925              | 0.713864          |
| N                | 0.858867                                | -0.732757             | 0.591846          |
| S                | 2.232667                                | -1.464928             | 0.194539          |
| N                | 3.276558                                | -0.399862             | -0.32547          |
| S                | 2.875872                                | 1.207759              | -0.21418          |
| <b>Total</b>     | <b>energy</b>                           | <b>-2390.973584</b>   |                   |
| <b>9b</b>        | <b>singlet</b>                          | <b>silylene</b>       |                   |
| <b>level:</b>    | <b>B3LYP/cc-pVTZ</b>                    |                       |                   |
| <b>Geometry:</b> |                                         |                       |                   |
| N                | -0.539206                               | 1.297101              | -0.00019          |
| Si               | -1.754257                               | -0.000156             | 0                 |
| N                | -0.538919                               | -1.297196             | 0.000191          |

|                  |                      |                       |                |
|------------------|----------------------|-----------------------|----------------|
| S                | 1.003457             | -1.065752             | -0.0001        |
| S                | 1.003197             | 1.06593               | 0.000101       |
| <b>Total</b>     | <b>energy</b>        | <b>-1195.481129</b>   |                |
| <b>9b</b>        | <b>+</b>             | <b>BH3</b>            | <b>complex</b> |
| <b>level:</b>    | <b>B3LYP/cc-pVTZ</b> |                       |                |
| <b>Geometry:</b> |                      |                       |                |
| N                | -0.114509            | -1.306327             | -0.00954       |
| S                | 1.426188             | -1.067594             | 0.006          |
| S                | 1.43984              | 1.056303              | 0.006241       |
| N                | -0.098837            | 1.314227              | -0.00945       |
| Si               | -1.26018             | 0.011594              | -0.01985       |
| B                | -3.234472            | 0.000407              | 0.018951       |
| H                | -3.548753            | 1.125806              | -0.26005       |
| H                | -3.53544             | -0.846994             | -0.78142       |
| H                | -3.463961            | -0.317807             | 1.161706       |
| <b>Total</b>     | <b>energy</b>        | <b>-1222.142173</b>   |                |
| <b>9b</b>        | <b>silane</b>        | <b>derivative</b>     |                |
| <b>level:</b>    | <b>B3LYP/cc-pVTZ</b> |                       |                |
| <b>Geometry:</b> |                      |                       |                |
| N                | 0.46759              | -1.346543             | -0.00064       |
| Si               | 1.605769             | -0.000019             | 0.000022       |
| N                | 0.467983             | 1.346402              | 0.000022       |
| S                | -1.062415            | 1.051649              | -5.1E-05       |
| S                | -1.062555            | -1.051503             | 0.000189       |
| H                | 2.484598             | -0.001477             | 1.198498       |
| H                | 2.485146             | 0.000392              | -1.19667       |
| <b>Total</b>     | <b>energy</b>        | <b>-1196.688487</b>   |                |
| <b>9b</b>        | <b>+</b>             | <b>NH<sub>3</sub></b> | <b>complex</b> |
| <b>level:</b>    | <b>B3LYP/cc-pVTZ</b> |                       |                |
| <b>Geometry:</b> |                      |                       |                |
| N                | -0.023157            | 1.303161              | 0.527919       |
| Si               | 1.010303             | -0.004043             | 1.172621       |
| N                | -0.026094            | -1.306225             | 0.522535       |
| S                | -1.27934             | -1.060821             | -0.37414       |
| S                | -1.276817            | 1.06427               | -0.37002       |
| N                | 2.635371             | 0.001477              | -1.10606       |
| H                | 3.576536             | -0.053444             | -0.73515       |
| H                | 2.504471             | -0.785509             | -1.73134       |
| H                | 2.570402             | 0.851482              | -1.65455       |
| <b>Total</b>     | <b>energy</b>        | <b>-1252.070312</b>   |                |
| <b>9b</b>        | <b>triplet</b>       | <b>silylene</b>       |                |
| <b>level:</b>    | <b>B3LYP/cc-pVTZ</b> |                       |                |
| <b>Geometry:</b> |                      |                       |                |
| N                | 0.556809             | 1.325964              | 0.125646       |
| Si               | 1.724702             | -0.001481             | -0.07154       |
| N                | 0.554043             | -1.326823             | 0.125173       |

|                  |                                         |                       |                   |
|------------------|-----------------------------------------|-----------------------|-------------------|
| S                | -0.998572                               | -1.232732             | -0.02345          |
| S                | -0.99654                                | 1.234404              | -0.02368          |
| <b>Total</b>     | <b>energy</b>                           | <b>-1195.44394</b>    |                   |
| <hr/>            |                                         |                       |                   |
| <b>9b</b>        | <b>disilene</b>                         | <b>dimer</b>          | <b>derivative</b> |
| <b>level:</b>    | <b>B3LYP/cc-pVTZ</b>                    |                       |                   |
| <b>Geometry:</b> |                                         |                       |                   |
| N                | 2.067737                                | 1.393404              | 0.000284          |
| S                | 3.681061                                | 1.13896               | 0.000038          |
| S                | 3.68117                                 | -1.13887              | -0.00031          |
| N                | 2.067839                                | -1.393484             | -0.00013          |
| Si               | 1.141292                                | -0.000078             | 0.000453          |
| Si               | -1.141294                               | 0.000066              | -0.00014          |
| N                | -2.067839                               | 1.393476              | -0.00021          |
| S                | -3.681155                               | 1.138939              | -0.0002           |
| S                | -3.681073                               | -1.139021             | 0.000139          |
| N                | -2.067739                               | -1.39339              | 0.0002            |
| <b>Total</b>     | <b>energy:</b>                          | <b>-2390.944426</b>   |                   |
| <hr/>            |                                         |                       |                   |
| <b>9b</b>        | <b>(<math>\mu</math>-N)<sub>2</sub></b> | <b>dimer</b>          | <b>derivative</b> |
| <b>level:</b>    | <b>B3LYP/cc-pVTZ</b>                    |                       |                   |
| <b>Geometry:</b> |                                         |                       |                   |
| N                | 0.819463                                | 0.885498              | 0.293207          |
| S                | 2.403013                                | 1.427731              | 0.189517          |
| S                | 3.280101                                | -0.583558             | -0.29213          |
| N                | 2.032141                                | -1.517346             | -0.02301          |
| Si               | 0.637827                                | -0.869437             | 0.74908           |
| Si               | -0.637831                               | 0.869459              | -0.74901          |
| N                | -0.819435                               | -0.885467             | -0.29319          |
| S                | -2.403013                               | -1.427674             | -0.1895           |
| S                | -3.280088                               | 0.583457              | 0.292072          |
| N                | -2.032188                               | 1.51737               | 0.022961          |
| <b>Total</b>     | <b>energy</b>                           | <b>-2390.972177</b>   |                   |
| <hr/>            |                                         |                       |                   |
| <b>9c</b>        | <b>singlet</b>                          | <b>silylene</b>       |                   |
| <b>level:</b>    | <b>B3LYP/cc-pVTZ</b>                    |                       |                   |
| <b>Geometry:</b> |                                         |                       |                   |
| S                | -1.5224                                 | -0.002131             | -6.1E-05          |
| Si               | -0.003193                               | -1.519737             | 0.000103          |
| S                | 1.522363                                | -0.00723              | -0.00012          |
| N                | 0.608317                                | 1.528895              | 0.000269          |
| N                | -0.601846                               | 1.531974              | -6.5E-05          |
| <b>Total</b>     | <b>energy</b>                           | <b>-1195.500992</b>   |                   |
| <hr/>            |                                         |                       |                   |
| <b>9c</b>        | <b>+</b>                                | <b>BH<sub>3</sub></b> | <b>complex</b>    |
| <b>level:</b>    | <b>B3LYP/cc-pVTZ</b>                    |                       |                   |
| <b>Geometry:</b> |                                         |                       |                   |
| S                | 0.405451                                | 1.5564                | -0.01999          |
| Si               | -1.048274                               | -0.000869             | -0.08407          |
| S                | 0.406705                                | -1.556475             | -0.01992          |

|                  |                      |                       |                |
|------------------|----------------------|-----------------------|----------------|
| N                | 1.90856              | -0.606324             | 0.061165       |
| N                | 1.907629             | 0.608118              | 0.061111       |
| B                | -3.038813            | 0.000007              | 0.090952       |
| H                | -3.027295            | -0.001203             | 1.305226       |
| H                | -3.406355            | -1.027811             | -0.40137       |
| H                | -3.404253            | 1.029791              | -0.39901       |
| <b>Total</b>     | <b>energy</b>        | <b>-1222.150646</b>   |                |
| <hr/>            |                      |                       |                |
| <b>9c</b>        | <b>silane</b>        | <b>derivative</b>     |                |
| <b>level:</b>    | <b>B3LYP/cc-pVTZ</b> |                       |                |
| <b>Geometry:</b> |                      |                       |                |
| S                | -1.601843            | -0.065328             | 0.000181       |
| Si               | 0.006145             | 1.390448              | -0.00025       |
| S                | 1.601579             | -0.075806             | 0.000263       |
| N                | 0.59778              | -1.552538             | -2E-06         |
| N                | -0.611284            | -1.546297             | -0.00055       |
| H                | 0.004529             | 2.241302              | 1.211032       |
| H                | 0.008208             | 2.242416              | -1.2107        |
| <b>Total</b>     | <b>energy</b>        | <b>-1196.707115</b>   |                |
| <hr/>            |                      |                       |                |
| <b>9c</b>        | <b>+</b>             | <b>NH<sub>3</sub></b> | <b>complex</b> |
| <b>level:</b>    | <b>B3LYP/cc-pVTZ</b> |                       |                |
| <b>Geometry:</b> |                      |                       |                |
| S                | -0.392635            | -1.543701             | -0.25309       |
| Si               | 1.04384              | -0.005355             | -0.85405       |
| S                | -0.382853            | 1.544259              | -0.25647       |
| N                | -1.675108            | 0.607125              | 0.619222       |
| N                | -1.679598            | -0.595233             | 0.620847       |
| N                | 2.081992             | -0.002096             | 1.04805        |
| H                | 1.767191             | -0.798789             | 1.595715       |
| H                | 1.845039             | 0.849349              | 1.550749       |
| H                | 3.090816             | -0.053097             | 0.946305       |
| <b>Total</b>     | <b>energy</b>        | <b>-1252.104949</b>   |                |
| <hr/>            |                      |                       |                |
| <b>9d</b>        | <b>singlet</b>       | <b>silylene</b>       |                |
| <b>level:</b>    | <b>B3LYP/cc-pVTZ</b> |                       |                |
| <b>Geometry:</b> |                      |                       |                |
| Si               | -1.745174            | -0.442845             | 0              |
| N                | -1.006918            | 1.323932              | -3E-06         |
| N                | -0.056703            | 1.929101              | 0.000004       |
| S                | 1.730799             | 0.153652              | -1E-06         |
| S                | 0.261562             | -1.189365             | 0.000001       |
| <b>Total</b>     | <b>energy</b>        | <b>-1195.496599</b>   |                |
| <hr/>            |                      |                       |                |
| <b>9d</b>        | <b>+</b>             | <b>BH<sub>3</sub></b> | <b>complex</b> |
| <b>level:</b>    | <b>B3LYP/cc-pVTZ</b> |                       |                |
| <b>Geometry:</b> |                      |                       |                |
| Si               | -1.260788            | -0.040614             | -0.00015       |
| N                | -0.295216            | 1.520895              | -7.2E-05       |
| N                | 0.832307             | 1.773596              | 0.000001       |



|                  |                                         |                       |                   |
|------------------|-----------------------------------------|-----------------------|-------------------|
| S                | 2.068392                                | -0.060449             | 0.000096          |
| S                | 0.463682                                | -1.278395             | -5.2E-05          |
| B                | -3.229582                               | -0.141025             | 0.000187          |
| H                | -3.503569                               | -1.306978             | 0.000298          |
| H                | -3.48476                                | 0.470327              | 1.009784          |
| H                | -3.48556                                | 0.470427              | -1.00911          |
| <b>Total</b>     | <b>energy</b>                           | <b>-1222.148856</b>   |                   |
| <b>9d</b>        | <b>silane</b>                           | <b>derivative</b>     |                   |
| <b>level:</b>    | <b>B3LYP/cc-pVTZ</b>                    |                       |                   |
| <b>Geometry:</b> |                                         |                       |                   |
| Si               | 1.551148                                | -0.010025             | 0.000103          |
| N                | 0.62595                                 | 1.53174               | -0.00017          |
| N                | -0.583565                               | 1.593797              | -0.00011          |
| S                | -1.575535                               | 0.075845              | 0.000114          |
| S                | -0.100727                               | -1.424932             | -0.00011          |
| H                | 2.403929                                | -0.07668              | -1.20802          |
| H                | 2.403492                                | -0.076332             | 1.208557          |
| <b>Total</b>     | <b>energy</b>                           | <b>-1196.709452</b>   |                   |
| <b>9d</b>        | <b>(<math>\mu</math>-N)<sub>2</sub></b> | <b>dimer</b>          | <b>derivative</b> |
| <b>level:</b>    | <b>B3LYP/cc-pVTZ</b>                    |                       |                   |
| <b>Geometry:</b> |                                         |                       |                   |
| Si               | 0.872485                                | -1.194168             | 0.508992          |
| S                | 3.021881                                | -1.159644             | -0.18456          |
| N                | 0.882106                                | 0.674466              | 0.572836          |
| Si               | -0.871214                               | 1.200089              | -0.48941          |
| N                | 1.850693                                | 1.457638              | 0.409771          |
| S                | 3.319593                                | 0.896474              | -0.1249           |
| N                | -0.872514                               | -0.669148             | -0.54989          |
| N                | -1.841161                               | -1.45617              | -0.40027          |
| S                | -3.319313                               | -0.900694             | 0.108953          |
| S                | -3.03164                                | 1.155713              | 0.169173          |
| <b>Total</b>     | <b>energy</b>                           | <b>-2390.988468</b>   |                   |
| <b>10</b>        | <b>singlet</b>                          | <b>silylene</b>       |                   |
| <b>level:</b>    | <b>B3LYP/cc-pVTZ</b>                    |                       |                   |
| <b>Geometry:</b> |                                         |                       |                   |
| C                | -1.254919                               | -0.67559              | 0                 |
| N                | 0.028814                                | -1.196308             | 0.000001          |
| C                | -1.254919                               | 0.67559               | 0                 |
| Si               | 1.330302                                | 0                     | -1E-06            |
| N                | 0.028814                                | 1.196308              | 0.000001          |
| H                | 0.140135                                | 2.1963                | 0.000001          |
| H                | -2.124433                               | -1.31216              | 0                 |
| H                | 0.140135                                | -2.1963               | 0.000001          |
| H                | -2.124433                               | 1.31216               | 0                 |
| <b>Total</b>     | <b>energy</b>                           | <b>-477.742772</b>    |                   |
| <b>10</b>        | <b>+</b>                                | <b>BH<sub>3</sub></b> | <b>complex</b>    |

|                  |                      |                       |                |
|------------------|----------------------|-----------------------|----------------|
| <b>level:</b>    | <b>B3LYP/cc-pVTZ</b> |                       |                |
| <b>Geometry:</b> |                      |                       |                |
| C                | 1.763892             | -0.663164             | 0.003505       |
| N                | 0.480796             | -1.210285             | -0.0014        |
| Si               | -0.767798            | -0.012177             | -0.00517       |
| B                | -2.747075            | 0.002419              | 0.005428       |
| C                | 1.751661             | 0.683749              | 0.003398       |
| N                | 0.458536             | 1.206549              | -0.00181       |
| H                | 0.331069             | 2.203987              | -0.00441       |
| H                | 2.635472             | -1.294938             | 0.005251       |
| H                | 0.374117             | -2.210137             | -0.00379       |
| H                | 2.611436             | 1.331426              | 0.005135       |
| H                | -3.011379            | 1.162682              | -0.1927        |
| H                | -3.070688            | -0.74084              | -0.88637       |
| H                | -3.05412             | -0.39116              | 1.103094       |
| <b>Total</b>     | <b>energy</b>        | <b>-504.407653</b>    |                |
| <b>10</b>        | <b>silane</b>        | <b>derivative</b>     |                |
| <b>level:</b>    | <b>B3LYP/cc-pVTZ</b> |                       |                |
| <b>Geometry:</b> |                      |                       |                |
| C                | -1.330667            | 0.669006              | 0.000197       |
| N                | -0.036514            | 1.238335              | -0.00054       |
| C                | -1.330667            | -0.669006             | 0.000183       |
| Si               | 1.184822             | 0                     | 0.000184       |
| N                | -0.036513            | -1.238335             | -0.00057       |
| H                | 0.055739             | -2.23609              | 0.000272       |
| H                | -2.201098            | 1.302765              | 0.000442       |
| H                | 0.055736             | 2.23609               | 0.000155       |
| H                | -2.201098            | -1.302766             | 0.000422       |
| H                | 2.090474             | -0.000019             | 1.187383       |
| H                | 2.09194              | 0.00002               | -1.1858        |
| <b>Total</b>     | <b>energy</b>        | <b>-478.9394272</b>   |                |
| <b>10</b>        | <b>+</b>             | <b>NH<sub>3</sub></b> | <b>complex</b> |
| <b>level:</b>    | <b>B3LYP/cc-pVTZ</b> |                       |                |
| <b>Geometry:</b> |                      |                       |                |
| C                | 0.157616             | 0.34007               | 1.181694       |
| N                | -0.539367            | -0.819029             | 0.877006       |
| Si               | -1.581413            | -0.721974             | -0.54677       |
| N                | -1.003897            | 0.943861              | -0.67432       |
| C                | -0.104101            | 1.335175              | 0.304317       |
| H                | -1.269723            | 1.615267              | -1.37512       |
| H                | 0.820636             | 0.394021              | 2.029262       |
| H                | -0.404398            | -1.623886             | 1.465923       |
| H                | 0.301627             | 2.333199              | 0.332041       |
| N                | 3.366696             | -0.398652             | -0.41897       |
| H                | 3.314759             | -1.064314             | -1.18182       |
| H                | 2.417549             | -0.085222             | -0.24341       |

|                  |                      |                       |                |
|------------------|----------------------|-----------------------|----------------|
| H                | 3.874226             | 0.403842              | -0.77417       |
| <b>Total</b>     | <b>energy</b>        | <b>-534.3295311</b>   |                |
| <b>10</b>        | <b>triplet</b>       | <b>silylene</b>       |                |
| <b>level:</b>    | <b>B3LYP/cc-pVTZ</b> |                       |                |
| <b>Geometry:</b> |                      |                       |                |
| C                | -1.236496            | -0.700059             | -0.0706        |
| C                | -1.23648             | 0.700077              | -0.07061       |
| N                | -0.05181             | 1.255767              | 0.184504       |
| Si               | 1.412479             | -0.000011             | -0.10224       |
| N                | -0.051826            | -1.255763             | 0.184444       |
| H                | 0.022106             | 2.258133              | 0.107164       |
| H                | -2.127794            | -1.283688             | -0.2592        |
| H                | 0.022038             | -2.258148             | 0.107321       |
| H                | -2.127751            | 1.283719              | -0.2593        |
| <b>Total</b>     | <b>energy</b>        | <b>-477.6454334</b>   |                |
| <b>11</b>        | <b>singlet</b>       | <b>silylene</b>       |                |
| <b>level:</b>    | <b>B3LYP/cc-pVTZ</b> |                       |                |
| <b>Geometry:</b> |                      |                       |                |
| C                | -1.234605            | 0.755324              | 0.140244       |
| C                | -1.234622            | -0.755318             | -0.14024       |
| N                | 0.13642              | -1.210004             | 0.115487       |
| Si               | 1.376739             | -0.000008             | 0.000001       |
| N                | 0.136444             | 1.210008              | -0.1155        |
| H                | 0.295039             | -2.202438             | 0.064275       |
| H                | -1.522514            | 0.946156              | 1.180719       |
| H                | 0.295014             | 2.202447              | -0.06424       |
| H                | -1.957022            | -1.265319             | 0.500236       |
| H                | -1.957007            | 1.265343              | -0.50022       |
| H                | -1.522542            | -0.946144             | -1.18071       |
| <b>Total</b>     | <b>energy</b>        | <b>-478.9440126</b>   |                |
| <b>11</b>        | <b>+</b>             | <b>BH<sub>3</sub></b> | <b>complex</b> |
| <b>level:</b>    | <b>B3LYP/cc-pVTZ</b> |                       |                |
| <b>Geometry:</b> |                      |                       |                |
| C                | 1.714524             | -0.766116             | 0.151704       |
| C                | 1.729573             | 0.75208               | -0.12143       |
| N                | 0.357216             | 1.227305              | 0.097866       |
| Si               | -0.829356            | 0.008974              | -0.02654       |
| N                | 0.345649             | -1.223528             | -0.12028       |
| H                | 0.198098             | 2.219105              | 0.053903       |
| H                | 1.989493             | -0.965387             | 1.192634       |
| H                | 0.173793             | -2.213679             | -0.089         |
| H                | 2.434776             | 1.250795              | 0.544679       |
| H                | 2.438119             | -1.274304             | -0.48693       |
| H                | 2.04615              | 0.948121              | -1.15102       |
| B                | -2.7913              | 0.000165              | 0.024151       |
| H                | -3.127026            | -0.912019             | -0.68961       |

|                  |                      |                       |                |
|------------------|----------------------|-----------------------|----------------|
| H                | -3.02455             | -0.212735             | 1.193278       |
| H                | -3.145998            | 1.091423              | -0.34191       |
| <b>Total</b>     | <b>energy</b>        | <b>-505.6156523</b>   |                |
| <b>11</b>        | <b>silane</b>        | <b>derivative</b>     |                |
| <b>level:</b>    | <b>B3LYP/cc-pVTZ</b> |                       |                |
| <b>Geometry:</b> |                      |                       |                |
| C                | 1.287258             | -0.745482             | 0.178499       |
| C                | 1.287258             | 0.745481              | -0.1785        |
| N                | -0.043952            | 1.249322              | 0.18601        |
| Si               | -1.234498            | 0                     | 0              |
| N                | -0.043952            | -1.249322             | -0.18601       |
| H                | -0.2086              | 2.216306              | -0.03839       |
| H                | 1.498338             | -0.863938             | 1.248906       |
| H                | -0.208602            | -2.216305             | 0.03839        |
| H                | 2.06977              | 1.267735              | 0.376616       |
| H                | 2.069769             | -1.267736             | -0.37662       |
| H                | 1.49834              | 0.863938              | -1.24891       |
| H                | -2.133902            | -0.119673             | 1.183998       |
| H                | -2.133903            | 0.119673              | -1.184         |
| <b>Total</b>     | <b>energy</b>        | <b>-480.1584289</b>   |                |
| <b>11</b>        | <b>+</b>             | <b>NH<sub>3</sub></b> | <b>complex</b> |
| <b>level:</b>    | <b>B3LYP/cc-pVTZ</b> |                       |                |
| <b>Geometry:</b> |                      |                       |                |
| C                | -1.306835            | 0.843786              | -0.68278       |
| N                | -0.546025            | 1.159016              | 0.525668       |
| Si               | 0.460826             | -0.131975             | 1.134422       |
| N                | -0.37557             | -1.23105              | 0.044425       |
| C                | -1.551229            | -0.66855              | -0.62747       |
| H                | -0.370906            | 2.135857              | 0.694655       |
| H                | -2.254204            | 1.386906              | -0.72372       |
| H                | -1.684308            | -1.073386             | -1.63465       |
| H                | -0.398704            | -2.226962             | 0.193189       |
| H                | -2.470357            | -0.874451             | -0.06448       |
| H                | -0.743373            | 1.096043              | -1.5923        |
| N                | 2.44006              | 0.112813              | -0.80792       |
| H                | 3.324067             | -0.223836             | -0.44574       |
| H                | 2.03511              | -0.619685             | -1.37875       |
| H                | 2.630233             | 0.910289              | -1.40384       |
| <b>Total</b>     | <b>energy</b>        | <b>-535.5310686</b>   |                |
| <b>11</b>        | <b>triplet</b>       | <b>silylene</b>       |                |
| <b>level:</b>    | <b>B3LYP/cc-pVTZ</b> |                       |                |
| <b>Geometry:</b> |                      |                       |                |
| C                | -1.169356            | -0.739032             | -0.20799       |
| N                | 0.121214             | -1.308157             | 0.223279       |
| Si               | 1.308558             | -0.00001              | 0.000039       |
| N                | 0.121228             | 1.30813               | -0.2234        |

|                  |                                         |                     |                   |
|------------------|-----------------------------------------|---------------------|-------------------|
| C                | -1.169308                               | 0.739063            | 0.208042          |
| H                | 0.315298                                | 2.203707            | 0.200502          |
| H                | -1.32003                                | -0.810149           | -1.29176          |
| H                | 0.315255                                | -2.203672           | -0.20076          |
| H                | -1.987791                               | 1.264386            | -0.28939          |
| H                | -1.987801                               | -1.264327           | 0.289541          |
| H                | -1.319851                               | 0.810196            | 1.291837          |
| <b>Total</b>     | <b>energy</b>                           | <b>-478.8254639</b> |                   |
| <b>11</b>        | <b>(<math>\mu</math>-N)<sub>2</sub></b> | <b>dimer</b>        | <b>derivative</b> |
| <b>level:</b>    | <b>B3LYP/cc-pVTZ</b>                    |                     |                   |
| <b>Geometry:</b> |                                         |                     |                   |
| Si               | 0.604381                                | -1.179169           | 0.697417          |
| N                | 2.095938                                | -1.121476           | -0.23376          |
| C                | 2.652902                                | 0.17725             | -0.59559          |
| C                | 2.117879                                | 1.172864            | 0.438426          |
| N                | 0.726597                                | 0.756983            | 0.746859          |
| H                | 2.705578                                | -1.913537           | -0.33281          |
| H                | 2.350126                                | 0.496735            | -1.60039          |
| H                | 2.136268                                | 2.195471            | 0.053646          |
| H                | 0.419391                                | 1.164336            | 1.622806          |
| Si               | -0.60438                                | 1.179195            | -0.6974           |
| N                | -0.726567                               | -0.756965           | -0.74682          |
| N                | -2.095998                               | 1.121442            | 0.233654          |
| C                | -2.652934                               | -0.177268           | 0.595561          |
| C                | -2.117845                               | -1.172882           | -0.43842          |
| H                | -2.705477                               | 1.913572            | 0.333142          |
| H                | -2.350191                               | -0.496717           | 1.600379          |
| H                | -2.136214                               | -2.195482           | -0.05362          |
| H                | -0.419324                               | -1.16432            | -1.62275          |
| H                | 3.744435                                | 0.166458            | -0.5769           |
| H                | 2.721808                                | 1.125653            | 1.346669          |
| H                | -2.721746                               | -1.1257             | -1.34668          |
| H                | -3.744468                               | -0.166513           | 0.576811          |
| <b>Total</b>     | <b>energy</b>                           | <b>-957.9018104</b> |                   |
| <b>12</b>        | <b>singlet</b>                          | <b>silylene</b>     |                   |
| <b>level:</b>    | <b>B3LYP/cc-pVTZ</b>                    |                     |                   |
| <b>Geometry:</b> |                                         |                     |                   |
| C                | 1.245034                                | -0.979879           | 0                 |
| N                | -0.060139                               | -1.429517           | 0                 |
| C                | 1.439798                                | 0.350607            | 0                 |
| Si               | -1.425316                               | -0.313807           | 0                 |
| S                | 0                                       | 1.342728            | 0                 |
| H                | 2.050051                                | -1.701665           | 0                 |
| H                | -0.191417                               | -2.429827           | 0                 |
| H                | 2.407771                                | 0.823395            | 0                 |
| <b>Total</b>     | <b>energy</b>                           | <b>-820.5956014</b> |                   |

| <b>12</b>        | <b>+</b>             | <b>BH<sub>3</sub></b> | <b>complex</b> |
|------------------|----------------------|-----------------------|----------------|
| <b>level:</b>    | <b>B3LYP/cc-pVTZ</b> |                       |                |
| <b>Geometry:</b> |                      |                       |                |
| C                | -1.462796            | 1.229256              | 0.001945       |
| N                | -0.089749            | 1.413447              | -0.00201       |
| Si               | 0.93798              | 0.022682              | -0.00388       |
| B                | 2.917266             | -0.055963             | 0.004015       |
| C                | -1.92339             | -0.030874             | 0.003245       |
| S                | -0.723473            | -1.319953             | -0.00066       |
| H                | -2.103795            | 2.099007              | 0.003242       |
| H                | 0.257282             | 2.360252              | -0.0043        |
| H                | -2.964631            | -0.304771             | 0.005327       |
| H                | 3.220899             | -0.731125             | -0.94432       |
| H                | 3.188032             | 1.116827              | -0.09953       |
| H                | 3.205083             | -0.543095             | 1.067248       |
| <b>Total</b>     | <b>energy</b>        | <b>-847.2571794</b>   |                |
| <b>12</b>        | <b>silane</b>        | <b>derivative</b>     |                |
| <b>level:</b>    | <b>B3LYP/cc-pVTZ</b> |                       |                |
| <b>Geometry:</b> |                      |                       |                |
| C                | -0.49948             | 1.552581              | -0.00002       |
| N                | 0.854049             | 1.215581              | -0.00101       |
| C                | -1.417663            | 0.58437               | 0.000448       |
| Si               | 1.21292              | -0.492797             | 0.000239       |
| S                | -0.855928            | -1.116385             | -0.00018       |
| H                | -0.757707            | 2.602416              | 0.000276       |
| H                | 1.520558             | 1.967076              | 0.001598       |
| H                | -2.48159             | 0.746577              | 0.000694       |
| H                | 1.97868              | -0.943871             | -1.19201       |
| H                | 1.978536             | -0.941654             | 1.193491       |
| <b>Total</b>     | <b>energy</b>        | <b>-821.7986478</b>   |                |
| <b>12</b>        | <b>+</b>             | <b>NH<sub>3</sub></b> | <b>complex</b> |
| <b>level:</b>    | <b>B3LYP/cc-pVTZ</b> |                       |                |
| <b>Geometry:</b> |                      |                       |                |
| C                | 1.202913             | 1.233079              | 0.446395       |
| N                | 0.122018             | 1.431607              | -0.40074       |
| Si               | -0.805666            | 0.059128              | -1.03508       |
| S                | 0.705267             | -1.305041             | -0.15068       |
| C                | 1.595614             | -0.026402             | 0.685819       |
| H                | 1.700365             | 2.09684               | 0.86853        |
| H                | -0.118438            | 2.387344              | -0.6091        |
| H                | 2.432665             | -0.292991             | 1.309721       |
| N                | -2.120347            | -0.123165             | 1.039716       |
| H                | -2.431488            | -1.084105             | 1.125801       |
| H                | -1.467275            | 0.060269              | 1.793606       |
| H                | -2.923636            | 0.486347              | 1.147253       |
| <b>Total</b>     | <b>energy</b>        | <b>-877.1839879</b>   |                |

| <b>12</b>        | <b>triplet</b>                                   | <b>silylene</b>     |                   |
|------------------|--------------------------------------------------|---------------------|-------------------|
| <b>level:</b>    | <b>B3LYP/cc-pVTZ</b>                             |                     |                   |
| <b>Geometry:</b> |                                                  |                     |                   |
| C                | -0.345868                                        | 1.534963            | 0.04307           |
| N                | -1.316294                                        | 0.689185            | -0.25753          |
| C                | 0.957021                                         | 1.056598            | 0.192699          |
| Si               | -1.004448                                        | -1.168952           | 0.154421          |
| S                | 1.291323                                         | -0.587292           | -0.13086          |
| H                | -0.561616                                        | 2.590565            | 0.176749          |
| H                | -2.247613                                        | 1.073053            | -0.33276          |
| H                | 1.757478                                         | 1.724714            | 0.475938          |
| <b>Total</b>     | <b>energy</b>                                    | <b>-820.503097</b>  |                   |
| <b>12</b>        | <b>(<math>\mu</math>-N)<sub>2</sub></b>          | <b>dimer</b>        | <b>derivative</b> |
| <b>level:</b>    | <b>B3LYP/cc-pVTZ</b>                             |                     |                   |
| <b>Geometry:</b> |                                                  |                     |                   |
| C                | -2.762317                                        | 0.915634            | 0.209007          |
| C                | -1.76717                                         | 1.633215            | -0.3              |
| N                | -0.56384                                         | 0.954565            | -0.70948          |
| Si               | 0.712596                                         | 0.978012            | 0.864978          |
| S                | 2.685038                                         | 0.850686            | -0.22731          |
| C                | 2.762305                                         | -0.915677           | -0.20895          |
| C                | 1.767147                                         | -1.633213           | 0.300101          |
| N                | 0.563819                                         | -0.954522           | 0.709506          |
| Si               | -0.712562                                        | -0.977968           | -0.865            |
| S                | -2.685038                                        | -0.850728           | 0.227237          |
| H                | 0.150659                                         | -1.380503           | 1.534338          |
| H                | -3.653457                                        | 1.375868            | 0.609594          |
| H                | -1.772281                                        | 2.713112            | -0.34542          |
| H                | -0.150724                                        | 1.38058             | -1.53431          |
| H                | 1.772248                                         | -2.713107           | 0.34559           |
| H                | 3.653446                                         | -1.375945           | -0.6095           |
| <b>Total</b>     | <b>energy</b>                                    | <b>-1641.164999</b> |                   |
| <b>12</b>        | <b>(<math>\mu</math>-N) (<math>\mu</math>-S)</b> | <b>dimer</b>        | <b>derivative</b> |
| <b>level:</b>    | <b>B3LYP/cc-pVTZ</b>                             |                     |                   |
| <b>Geometry:</b> |                                                  |                     |                   |
| Si               | 0.644233                                         | -0.895901           | 0.93976           |
| S                | 2.623526                                         | -0.91886            | -0.09681          |
| C                | 2.712964                                         | 0.832855            | -0.31576          |
| C                | 1.743299                                         | 1.614267            | 0.146728          |
| N                | 0.570656                                         | 1.007338            | 0.714224          |
| H                | 3.583145                                         | 1.229987            | -0.8173           |
| H                | 1.750371                                         | 2.691104            | 0.048251          |
| H                | 0.281231                                         | 1.477301            | 1.568779          |
| Si               | -0.978999                                        | 1.306753            | -0.71206          |
| S                | -0.978924                                        | -1.021674           | -0.97656          |
| C                | -2.364111                                        | -1.273884           | 0.11852           |

|                  |                      |                       |                |
|------------------|----------------------|-----------------------|----------------|
| C                | -2.917105            | -0.177561             | 0.646265       |
| N                | -2.405664            | 1.07507               | 0.341514       |
| H                | -2.694473            | -2.280747             | 0.307925       |
| H                | -3.776208            | -0.232885             | 1.303707       |
| H                | -2.976204            | 1.860934              | 0.610199       |
| <b>Total</b>     | <b>energy</b>        | <b>-1641.164477</b>   |                |
| <b>13</b>        | <b>singlet</b>       | <b>silylene</b>       |                |
| <b>level:</b>    | <b>B3LYP/cc-pVTZ</b> |                       |                |
| <b>Geometry:</b> |                      |                       |                |
| C                | 1.297301             | 0.963807              | -0.21198       |
| C                | 1.409509             | -0.480577             | 0.25363        |
| S                | -0.17637             | -1.375991             | -0.09664       |
| Si               | -1.44012             | 0.396155              | 0.046845       |
| N                | -0.06107             | 1.437162              | 0.067702       |
| H                | 1.512166             | 1.029252              | -1.28469       |
| H                | -0.171863            | 2.440442              | 0.070569       |
| H                | 2.214779             | -1.002989             | -0.25791       |
| H                | 2.034109             | 1.579094              | 0.311028       |
| H                | 1.581041             | -0.535639             | 1.327677       |
| <b>Total</b>     | <b>energy</b>        | <b>-821.8036874</b>   |                |
| <b>13</b>        | <b>+</b>             | <b>BH<sub>3</sub></b> | <b>complex</b> |
| <b>level:</b>    | <b>B3LYP/cc-pVTZ</b> |                       |                |
| <b>Geometry:</b> |                      |                       |                |
| C                | 1.505707             | 1.224402              | -0.18272       |
| C                | 1.892053             | -0.169349             | 0.302677       |
| S                | 0.556895             | -1.397515             | -0.10816       |
| Si               | -0.981355            | 0.076498              | -0.02129       |
| N                | 0.069932             | 1.41405               | 0.032494       |
| H                | 1.75365              | 1.335797              | -1.24312       |
| H                | -0.266028            | 2.364549              | 0.009656       |
| H                | 2.809354             | -0.514283             | -0.16743       |
| H                | 2.076214             | 1.971287              | 0.373258       |
| H                | 2.019389             | -0.188619             | 1.38319        |
| B                | -2.944937            | 0.015242              | 0.075349       |
| H                | -3.299324            | -0.873279             | -0.65404       |
| H                | -3.124566            | -0.236158             | 1.246032       |
| H                | -3.29144             | 1.125101              | -0.24294       |
| <b>Total</b>     | <b>energy</b>        | <b>-848.4705752</b>   |                |
| <b>13</b>        | <b>silane</b>        | <b>derivative</b>     |                |
| <b>level:</b>    | <b>B3LYP/cc-pVTZ</b> |                       |                |
| <b>Geometry:</b> |                      |                       |                |
| C                | 1.03413              | 1.270085              | -0.25506       |
| C                | 1.5145               | -0.067736             | 0.293901       |
| S                | 0.279784             | -1.399207             | -0.10619       |
| Si               | -1.34925             | 0.005205              | 0.039094       |
| N                | -0.371286            | 1.434271              | 0.113313       |



|                  |                                                 |                       |                   |
|------------------|-------------------------------------------------|-----------------------|-------------------|
| H                | 1.1936                                          | 1.297198              | -1.34013          |
| H                | -0.748222                                       | 2.354759              | -0.04485          |
| H                | 2.45721                                         | -0.36953              | -0.15675          |
| H                | 1.630956                                        | 2.072557              | 0.187915          |
| H                | 1.633152                                        | -0.023018             | 1.374716          |
| H                | -2.201298                                       | -0.140918             | 1.246916          |
| H                | -2.245204                                       | -0.130602             | -1.14228          |
| <b>Total</b>     | <b>energy</b>                                   | <b>-823.0198058</b>   |                   |
| <b>13</b>        | <b>+</b>                                        | <b>NH<sub>3</sub></b> | <b>complex</b>    |
| <b>level:</b>    | <b>B3LYP/cc-pVTZ</b>                            |                       |                   |
| <b>Geometry:</b> |                                                 |                       |                   |
| C                | 1.484486                                        | 1.136918              | 0.205566          |
| C                | 1.494522                                        | -0.264441             | 0.795978          |
| S                | 0.508444                                        | -1.389637             | -0.29432          |
| Si               | -0.929849                                       | 0.195642              | -0.91407          |
| N                | 0.123683                                        | 1.448205              | -0.23604          |
| H                | 2.199196                                        | 1.182229              | -0.62537          |
| H                | 0.035835                                        | 2.375098              | -0.62674          |
| H                | 2.506328                                        | -0.659331             | 0.861969          |
| H                | 1.820753                                        | 1.851935              | 0.964975          |
| H                | 1.059865                                        | -0.268273             | 1.796354          |
| N                | -2.100146                                       | -0.026353             | 0.987038          |
| H                | -3.102431                                       | 0.051572              | 0.856491          |
| H                | -1.886701                                       | -0.931216             | 1.394801          |
| H                | -1.788866                                       | 0.705362              | 1.617466          |
| <b>Total</b>     | <b>energy</b>                                   | <b>-878.3965048</b>   |                   |
| <b>13</b>        | <b>triplet</b>                                  | <b>silylene</b>       |                   |
| <b>level:</b>    | <b>B3LYP/cc-pVTZ</b>                            |                       |                   |
| <b>Geometry:</b> |                                                 |                       |                   |
| C                | -1.15025                                        | 1.107341              | -0.16178          |
| C                | 0.262393                                        | 1.319684              | 0.40906           |
| S                | 1.440064                                        | 0.024895              | -0.22568          |
| Si               | -0.182011                                       | -1.356575             | 0.20149           |
| N                | -1.550171                                       | -0.307449             | -0.09906          |
| H                | -1.162611                                       | 1.450953              | -1.19989          |
| H                | -2.228055                                       | -0.558374             | -0.8017           |
| H                | 0.655924                                        | 2.284844              | 0.093603          |
| H                | -1.842731                                       | 1.73258               | 0.411449          |
| H                | 0.262945                                        | 1.273719              | 1.496326          |
| <b>Total</b>     | <b>energy</b>                                   | <b>-821.6993538</b>   |                   |
| <b>13</b>        | <b>(<math>\mu</math>-N)(<math>\mu</math>-S)</b> | <b>dimer</b>          | <b>derivative</b> |
| <b>level:</b>    | <b>B3LYP/cc-pVTZ</b>                            |                       |                   |
| <b>Geometry:</b> |                                                 |                       |                   |
| C                | 1.845733                                        | 1.563554              | -0.14315          |
| N                | 0.591906                                        | 1.078259              | 0.505125          |
| Si               | 0.549288                                        | -0.81495              | 0.915747          |

|                  |                      |                       |                |
|------------------|----------------------|-----------------------|----------------|
| S                | 2.482493             | -1.105967             | -0.16363       |
| C                | 3.011274             | 0.631543              | 0.141907       |
| H                | 1.673217             | 1.606208              | -1.2198        |
| H                | 0.424195             | 1.597932              | 1.360501       |
| H                | 3.845505             | 0.844042              | -0.52533       |
| H                | 2.058367             | 2.580731              | 0.192893       |
| H                | 3.364754             | 0.732953              | 1.168306       |
| Si               | -0.984683            | 1.373665              | -0.753         |
| S                | -0.946276            | -1.028347             | -0.94386       |
| C                | -2.53288             | -1.249954             | -0.0237        |
| C                | -2.769253            | -0.085663             | 0.942151       |
| N                | -2.34877             | 1.169397              | 0.327143       |
| H                | -3.310263            | -1.300914             | -0.78402       |
| H                | -2.484742            | -2.202888             | 0.50173        |
| H                | -2.217865            | -0.279917             | 1.867059       |
| H                | -3.829085            | -0.043772             | 1.203799       |
| H                | -3.039227            | 1.902149              | 0.347101       |
| <b>Total</b>     | <b>energy</b>        | <b>-1643.609002</b>   |                |
| <b>14</b>        | <b>singlet</b>       | <b>silylene</b>       |                |
| <b>level:</b>    | <b>B3LYP/cc-pVTZ</b> |                       |                |
| <b>Geometry:</b> |                      |                       |                |
| C                | -0.669839            | 1.464398              | 0.000001       |
| C                | 0.669807             | 1.464416              | 0              |
| S                | 1.574505             | -0.029109             | 0              |
| Si               | 0.000022             | -1.528287             | 0.000001       |
| S                | -1.574509            | -0.02914              | -1E-06         |
| H                | -1.249174            | 2.377532              | 0.000006       |
| H                | 1.249115             | 2.377566              | -4E-06         |
| <b>Total</b>     | <b>energy</b>        | <b>-1163.442638</b>   |                |
| <b>14</b>        | <b>+</b>             | <b>BH<sub>3</sub></b> | <b>complex</b> |
| <b>level:</b>    | <b>B3LYP/cc-pVTZ</b> |                       |                |
| <b>Geometry:</b> |                      |                       |                |
| C                | -1.851889            | -0.668391             | 0.025232       |
| C                | -1.851888            | 0.668393              | 0.025233       |
| S                | -0.369377            | 1.603639              | -0.01024       |
| Si               | 1.040766             | -0.000001             | -0.03538       |
| S                | -0.369379            | -1.603639             | -0.01024       |
| H                | -2.765342            | -1.245586             | 0.043821       |
| H                | -2.76534             | 1.24559               | 0.043821       |
| B                | 3.022977             | -0.000001             | 0.040116       |
| H                | 3.345751             | 1.022793              | -0.50268       |
| H                | 3.196309             | 0.000005              | 1.237307       |
| H                | 3.345762             | -1.022794             | -0.50268       |
| <b>Total</b>     | <b>energy</b>        | <b>-1190.099918</b>   |                |
| <b>14</b>        | <b>silane</b>        | <b>derivative</b>     |                |
| <b>level:</b>    | <b>B3LYP/cc-pVTZ</b> |                       |                |

**Geometry:**

|              |               |                     |          |
|--------------|---------------|---------------------|----------|
| C            | -0.665151     | 1.493567            | 0.000007 |
| C            | 0.665155      | 1.493565            | 0.000007 |
| S            | 1.660676      | 0.026363            | -8E-06   |
| Si           | -0.000002     | -1.365402           | 0.000008 |
| S            | -1.660676     | 0.026366            | -8E-06   |
| H            | -1.233407     | 2.413091            | 0.000015 |
| H            | 1.233412      | 2.413089            | 0.000017 |
| H            | -0.000001     | -2.238487           | 1.198661 |
| H            | -0.000005     | -2.238511           | -1.19862 |
| <b>Total</b> | <b>energy</b> | <b>-1164.650388</b> |          |

---

| <b>14</b>        | <b>+</b>             | <b>NH<sub>3</sub></b> | <b>complex</b> |
|------------------|----------------------|-----------------------|----------------|
| <b>level:</b>    | <b>B3LYP/cc-pVTZ</b> |                       |                |
| <b>Geometry:</b> |                      |                       |                |
| C                | -1.57421             | 0.667716              | 0.543759       |
| C                | -1.574245            | -0.667632             | 0.543763       |
| S                | -0.345602            | -1.613086             | -0.30285       |
| Si               | 1.089781             | -0.000033             | -0.83556       |
| S                | -0.345514            | 1.613101              | -0.30286       |
| H                | -2.358392            | 1.236373              | 1.02572        |
| H                | -2.358456            | -1.236244             | 1.025728       |
| N                | 1.904606             | -0.000041             | 1.181896       |
| H                | 2.471454             | 0.826166              | 1.347958       |
| H                | 1.133421             | -0.000009             | 1.843327       |
| H                | 2.471397             | -0.826285             | 1.347969       |
| <b>Total</b>     | <b>energy</b>        | <b>-1220.03888</b>    |                |

---

| <b>14</b>        | <b>triplet</b>       | <b>silylene</b>     |          |
|------------------|----------------------|---------------------|----------|
| <b>level:</b>    | <b>B3LYP/cc-pVTZ</b> |                     |          |
| <b>Geometry:</b> |                      |                     |          |
| C                | -0.685163            | 1.357419            | 0.244371 |
| C                | 0.685188             | 1.357409            | 0.244371 |
| S                | 1.625053             | 0.009082            | -0.2625  |
| Si               | -0.000019            | -1.504003           | 0.308099 |
| S                | -1.625049            | 0.009106            | -0.2625  |
| H                | -1.221114            | 2.238045            | 0.577106 |
| H                | 1.221151             | 2.238028            | 0.577105 |
| <b>Total</b>     | <b>energy</b>        | <b>-1163.355496</b> |          |

---

| <b>15</b>        | <b>singlet</b>       | <b>silylene</b> |          |
|------------------|----------------------|-----------------|----------|
| <b>level:</b>    | <b>B3LYP/cc-pVTZ</b> |                 |          |
| <b>Geometry:</b> |                      |                 |          |
| C                | 0.694145             | -1.461932       | -0.29875 |
| S                | 1.59871              | 0.106675        | 0.078724 |
| Si               | 0                    | 1.557833        | 0        |
| S                | -1.59871             | 0.106674        | -0.07872 |
| C                | -0.694144            | -1.461931       | 0.298746 |
| H                | 0.659678             | -1.562846       | -1.38234 |

|                  |                      |                       |                |
|------------------|----------------------|-----------------------|----------------|
| H                | -1.291072            | -2.277194             | -0.11032       |
| H                | 1.291073             | -2.277193             | 0.110319       |
| H                | -0.659678            | -1.562846             | 1.382342       |
| <b>Total</b>     | <b>energy</b>        | <b>-1164.659813</b>   |                |
| <b>15</b>        | <b>+</b>             | <b>BH<sub>3</sub></b> | <b>complex</b> |
| <b>level:</b>    | <b>B3LYP/cc-pVTZ</b> |                       |                |
| <b>Geometry:</b> |                      |                       |                |
| C                | -1.848723            | -0.683481             | -0.25918       |
| S                | -0.290052            | -1.629365             | 0.057326       |
| Si               | 1.078797             | -0.007007             | -0.07355       |
| B                | 3.040488             | -0.005869             | 0.078131       |
| C                | -1.814135            | 0.700496              | 0.355846       |
| S                | -0.279376            | 1.628481              | -0.10128       |
| H                | -1.989189            | -0.635366             | -1.33714       |
| H                | -2.651616            | 1.298097              | -0.00287       |
| H                | -2.656885            | -1.272339             | 0.1737         |
| H                | -1.856872            | 0.653922              | 1.442202       |
| H                | 3.423709             | 1.024889              | -0.4044        |
| H                | 3.074532             | -0.000181             | 1.295606       |
| H                | 3.438719             | -1.029521             | -0.40478       |
| <b>Total</b>     | <b>energy</b>        | <b>-1191.321859</b>   |                |
| <b>15</b>        | <b>silane</b>        | <b>derivative</b>     |                |
| <b>level:</b>    | <b>B3LYP/cc-pVTZ</b> |                       |                |
| <b>Geometry:</b> |                      |                       |                |
| C                | 0.6758               | 1.469867              | 0.345456       |
| S                | 1.663977             | -0.034119             | -0.08204       |
| Si               | -0.00002             | -1.405819             | 0.000012       |
| S                | -1.663977            | -0.034082             | 0.082009       |
| C                | -0.675759            | 1.469896              | -0.34543       |
| H                | 0.562858             | 1.527325              | 1.426041       |
| H                | -1.275644            | 2.316541              | -0.01019       |
| H                | 1.275705             | 2.316513              | 0.010256       |
| H                | -0.562813            | 1.527386              | -1.42601       |
| H                | 0.027092             | -2.276849             | -1.20001       |
| H                | -0.027174            | -2.276813             | 1.200055       |
| <b>Total</b>     | <b>energy</b>        | <b>-1165.879684</b>   |                |
| <b>15</b>        | <b>+</b>             | <b>NH<sub>3</sub></b> | <b>complex</b> |
| <b>level:</b>    | <b>B3LYP/cc-pVTZ</b> |                       |                |
| <b>Geometry:</b> |                      |                       |                |
| C                | -1.846889            | -0.514117             | 0.235995       |
| S                | -0.413349            | -1.611046             | -0.16445       |
| Si               | 1.097347             | -0.125761             | -0.86261       |
| N                | 2.114541             | -0.111963             | 1.065849       |
| C                | -1.40595             | 0.833829              | 0.765034       |
| S                | -0.168853            | 1.61885               | -0.36145       |
| H                | -2.437972            | -0.396397             | -0.67048       |

|                  |                      |                     |                   |
|------------------|----------------------|---------------------|-------------------|
| H                | -2.252344            | 1.519645            | 0.822548          |
| H                | -2.448312            | -1.041919           | 0.977597          |
| H                | -0.977394            | 0.738958            | 1.76296           |
| H                | 3.096945             | -0.352779           | 0.987976          |
| H                | 2.032685             | 0.816778            | 1.468985          |
| H                | 1.654021             | -0.783017           | 1.6742            |
| <b>Total</b>     | <b>energy</b>        | <b>-1221.259703</b> |                   |
| <b>15</b>        | <b>triplet</b>       | <b>silylene</b>     |                   |
| <b>level:</b>    | <b>B3LYP/cc-pVTZ</b> |                     |                   |
| <b>Geometry:</b> |                      |                     |                   |
| C                | 0.714678             | 1.302147            | 0.467653          |
| S                | 1.66117              | -0.103148           | -0.2935           |
| Si               | 0.032104             | -1.403956           | 0.254014          |
| S                | -1.698282            | -0.148954           | -0.13857          |
| C                | -0.699522            | 1.431134            | -0.09856          |
| H                | 0.704707             | 1.167111            | 1.547104          |
| H                | -1.269432            | 2.144261            | 0.496413          |
| H                | 1.28008              | 2.204287            | 0.229533          |
| H                | -0.661949            | 1.773681            | -1.1306           |
| <b>Total</b>     | <b>energy</b>        | <b>-1164.570347</b> |                   |
| <b>15</b>        | <b>disilene</b>      | <b>dimer</b>        | <b>derivative</b> |
| <b>level:</b>    | <b>B3LYP/cc-pVTZ</b> |                     |                   |
| <b>Geometry:</b> |                      |                     |                   |
| C                | 3.613557             | -0.681393           | 0.733981          |
| C                | 3.905977             | 0.663463            | 0.102247          |
| S                | 2.363694             | 1.63605             | -0.21288          |
| Si               | 1.024601             | 0.004715            | -0.70307          |
| S                | 2.360604             | -1.630725           | -0.23774          |
| H                | 3.237354             | -0.56799            | 1.749408          |
| H                | 4.518128             | 1.273387            | 0.767312          |
| H                | 4.51374              | -1.296413           | 0.757995          |
| H                | 4.427124             | 0.547329            | -0.8459           |
| Si               | -1.024579            | 0.004712            | 0.703009          |
| S                | -2.360603            | -1.630724           | 0.23773           |
| C                | -3.613608            | -0.681384           | -0.73392          |
| C                | -3.905987            | 0.663469            | -0.10216          |
| S                | -2.363681            | 1.636051            | 0.212868          |
| H                | -3.237461            | -0.567978           | -1.74937          |
| H                | -4.513794            | -1.296401           | -0.75789          |
| H                | -4.518181            | 1.273397            | -0.76719          |
| H                | -4.427071            | 0.547332            | 0.846013          |
| <b>Total</b>     | <b>energy</b>        | <b>-2329.329481</b> |                   |
